# Supplementary material for: Comparative Characteristics and Pathogenic Potential of Escherichia coli Isolates Originating from Poultry Farms, Retail Meat, and Human Urinary Tract Infection
Source: MDPI journal article supplement (doi:10.3390/life12060845), 2022-06-06
Supplement: s1 [file s1]

Supplementary Tables S1 – S17 and Figure S1

Table S1. *E. coli* strains isolated from poultry farms (Poultry farm)

| #  | Strain | Farming system | Flock size | Animals age (weeks) |
|----|--------|----------------|------------|---------------------|
| 1  | BWO1   | cage           | 30 000     | 36                  |
| 2  | BWO2   | cage           | 30 000     | 36                  |
| 3  | BWO3   | cage           | 30 000     | 36                  |
| 4  | CJO1   | deep litter    | 800        | 80                  |
| 5  | CJO2   | deep litter    | 800        | 80                  |
| 6  | CMK2   | cage           | 1 500      | 22                  |
| 7  | CMO1   | cage           | 1 500      | 22                  |
| 8  | CMO2   | cage           | 1 500      | 22                  |
| 9  | DPO1   | cage           | 5 000      | 30                  |
| 10 | DPO2   | cage           | 5 000      | 30                  |
| 11 | DPO3   | cage           | 5 000      | 30                  |
| 12 | FD1O1  | deep litter    | 8 000      | 55                  |
| 13 | FD2O1  | deep litter    | 10 000     | 29                  |
| 14 | FD2O2  | deep litter    | 10 000     | 29                  |
| 15 | FD3K2  | deep litter    | 6 000      | 10                  |
| 16 | FD3O1  | deep litter    | 6 000      | 10                  |
| 17 | JAN1   | free range     | 25 000     | 28                  |
| 18 | JAO1   | free range     | 25 000     | 28                  |
| 19 | JAO2   | free range     | 25 000     | 28                  |
| 20 | JAO3   | free range     | 25 000     | 28                  |
| 21 | KAO1   | free range     | 600        | 36                  |
| 22 | KAO2   | free range     | 600        | 36                  |

|    |       |                          |        |    |
|----|-------|--------------------------|--------|----|
| 23 | KBO1  | free range               | 100    | 45 |
| 24 | KBO2  | free range               | 100    | 45 |
| 25 | MJO1  | cage                     | 10 000 | 52 |
| 26 | MJO2  | cage                     | 10 000 | 52 |
| 27 | PT1K2 | deep litter & free range | 8 600  | 26 |
| 28 | PT1N1 | deep litter & free range | 8 600  | 26 |
| 29 | PT1N2 | deep litter & free range | 8 600  | 26 |
| 30 | PT1O1 | deep litter & free range | 8 600  | 26 |
| 31 | PT1O2 | deep litter & free range | 8 600  | 26 |
| 32 | PT2K2 | deep litter & free range | 7 000  | 32 |
| 33 | PT2O1 | deep litter & free range | 7 000  | 32 |
| 34 | PT3K1 | deep litter & free range | 4 300  | 22 |
| 35 | PT3K2 | deep litter & free range | 4 300  | 22 |
| 36 | PWO1  | deep litter              | 1 300  | 80 |
| 37 | PWO2  | deep litter              | 1 300  | 80 |
| 38 | WWO1  | cage                     | 57 000 | 40 |
| 39 | WWO2  | cage                     | 57 000 | 40 |
| 40 | ZMK1M | cage                     | 12 000 | 83 |
| 41 | ZMN1M | cage                     | 17 000 | 37 |
| 42 | ZMN2M | cage                     | 17 000 | 37 |
| 43 | ZMN2S | cage                     | 17 000 | 37 |
| 44 | ZMN3M | cage                     | 17 000 | 37 |

Table S2. *E. coli* strains isolated from food samples (FOOD)

| # | Strain | Food sample    |
|---|--------|----------------|
| 1 | FOOD2  | Chicken/breast |
| 2 | FOOD3  | Chicken/breast |
| 3 | FOOD5  | Chicken/breast |
| 4 | FOOD6  | Chicken/breast |

|    |        |                |
|----|--------|----------------|
| 5  | FOOD10 | Chicken/breast |
| 6  | FOOD11 | Chicken/breast |
| 7  | FOOD12 | Pork/loin      |
| 8  | FOOD13 | Pork/loin      |
| 9  | FOOD15 | Pork/loin      |
| 10 | FOOD16 | Chicken/breast |
| 11 | FOOD18 | Pork/loin      |
| 12 | FOOD19 | Pork/loin      |
| 13 | FOOD20 | Chicken        |
| 14 | FOOD21 | Chicken/breast |
| 15 | FOOD22 | Chicken        |
| 16 | FOOD23 | Ground/turkey  |
| 17 | FOOD24 | Turkey/breast  |
| 18 | FOOD25 | Pork/shoulder  |
| 19 | FOOD27 | Ground/pork    |
| 20 | FOOD28 | Ground/chicken |
| 21 | FOOD29 | Chicken/breast |
| 22 | FOOD30 | Turkey         |
| 23 | FOOD31 | Chicken        |
| 24 | FOOD33 | Ground/chicken |
| 25 | FOOD34 | Chicken        |
| 26 | FOOD35 | Turkey         |
| 27 | FOOD36 | Ground/pork    |
| 28 | FOOD38 | Chicken        |
| 29 | FOOD41 | Chicken        |
| 30 | FOOD42 | Chicken/wing   |
| 31 | FOOD43 | Pork/shoulder  |
| 32 | FOOD44 | Chicken        |
| 33 | FOOD45 | Chicken/leg    |

|    |          |                |
|----|----------|----------------|
| 34 | FOOD46   | Chicken/wing   |
| 35 | FOOD48   | Chicken/breast |
| 36 | FOOD19S  | Ground/beef    |
| 37 | FOOD115N | Ground/pork    |
| 38 | FOOD119N | Ground/beef    |

Table S3. *E. coli* strains isolated from patients with urinary tract infections (UTI)

| #  | Strain | Patient sex | Age |
|----|--------|-------------|-----|
| 1  | UTI1   | female      | 44  |
| 2  | UTI2   | male        | 64  |
| 3  | UTI3   | male        | 41  |
| 4  | UTI4   | female      | 70  |
| 5  | UTI5   | female      | 87  |
| 6  | UTI6   | male        | 24  |
| 7  | UTI7   | female      | 90  |
| 8  | UTI8   | female      | 30  |
| 9  | UTI9   | female      | 41  |
| 10 | UTI10  | female      | 60  |
| 11 | UTI11  | female      | 63  |
| 12 | UTI12  | male        | 35  |
| 13 | UTI13  | female      | 34  |
| 14 | UTI14  | female      | 16  |
| 15 | UTI15  | female      | 15  |
| 16 | UTI16  | male        | 80  |
| 17 | UTI17  | male        | 34  |
| 18 | UTI18  | female      | 31  |
| 19 | UTI19  | female      | 70  |
| 20 | UTI20  | female      | 39  |

|    |       |        |    |
|----|-------|--------|----|
| 21 | UTI21 | male   | 40 |
| 22 | UTI22 | male   | 73 |
| 23 | UTI23 | female | 86 |
| 24 | UTI24 | female | 84 |
| 25 | UTI25 | female | 66 |
| 26 | UTI26 | female | 32 |
| 27 | UTI27 | male   | 60 |
| 28 | UTI28 | male   | 46 |
| 29 | UTI29 | female | 32 |
| 30 | UTI30 | male   | 56 |
| 31 | UTI31 | female | 38 |
| 32 | UTI32 | female | 18 |
| 33 | UTI33 | male   | 16 |
| 34 | UTI34 | female | 33 |
| 35 | UTI35 | female | 33 |
| 36 | UTI36 | female | 86 |
| 37 | UTI37 | female | 62 |
| 38 | UTI38 | female | 17 |
| 39 | UTI39 | female | 28 |
| 40 | UTI40 | female | 43 |
| 41 | UTI41 | female | 73 |
| 42 | UTI42 | male   | 88 |
| 43 | UTI43 | female | 84 |
| 44 | UTI44 | male   | 34 |
| 45 | UTI45 | female | 82 |
| 46 | UTI46 | female | 80 |
| 47 | UTI47 | male   | 65 |
| 48 | UTI48 | male   | 30 |
| 49 | UTI49 | female | 23 |

|    |       |      |    |
|----|-------|------|----|
| 50 | UTI81 | male | 55 |
|----|-------|------|----|

Table S4. The list of the primers (Genomed, Warszawa, Poland) used for the determination of the phylogenetic groups of *E. coli* in the quadruplex-PCR method

| Gene           | Sequence of Primers                                                   | PCR Product Size (bp) | Gene Bank ID |
|----------------|-----------------------------------------------------------------------|-----------------------|--------------|
| <i>yjaA</i>    | 5' -CAAACGTGAAGTGTCAAGGAG-3'<br>5' -AATGCGTTCCTCAACCTGTG-3'           | 288                   | 948515       |
| <i>chuA</i>    | 5' -CAAACGTGAAGTGTCAAGGAG-3'<br>5' -AATGCGTTCCTCAACCTGTG-3'           | 211                   | 7155958      |
| <i>TspE4C2</i> | 5' -CACTATTCGTAAGGTCATCC-3'<br>5' -AGTTTATCGCTGCGGGTCGC-3'            | 152                   | EU240725.1   |
| <i>arpA</i>    | 5' -AACGCTATTCGCCAGCTTGC-3'<br>5' -TCTCCCCATACCGTACGCTA-3'            | 400                   | 7155679      |
| <i>arpA</i>    | 5' -GATTCCATCTTGTCAAAATATGCC-3'<br>5'-<br>GAAAAGAAAAAGAATTCCCAAGAG 3' | 301                   | 944933       |
| <i>trpA</i>    | 5' -AGTTTTATGCCCAGTGCGAG-3'<br>5' -TCTGCGCCGGTCACGCCC-3'              | 219                   | 912862       |
| <i>trpA</i>    | 5' -CGGCGATAAAGACATCTTCAC-3'<br>5' -GCAACGCGGCCTGGCGGAAG-3'           | 489                   | 13702525     |

For the reaction, there was set up 25 µl of PCR mixture per sample containing 50 ng of template DNA, 2-U Taq polymerase DNA DreamTaq™ Green (Thermo Scientific, Vilnius, Lithuania), 2.5 µL of 10 × DNA DreamTaq™ Green Buffer (Thermo Scientific, Vilnius, Lithuania), 200-mM dNTP (Thermo Scientific, Vilnius, Lithuania) and 20 pmol each of the primers (Genomed, Warszawa, Poland). PCR amplifications were performed with parameters as follows: 95 °C for 4 min and 30 cycles of denaturation (30 s, 95 °C), annealing (20 s, 59 °C for quadruplex and phylogroup C and 20 s, 57 °C for phylogroup E), extension steps (1 min, 72 °C) and final extension (10 min, 68 °C).

Table S5. Characterization of *E. coli* isolates from poultry farms (Poultry farm – AFEC)

| Strains | Ph | Genes amplified in quadruplex PCR reactions |             |             |                 | group C                        | group E                        |
|---------|----|---------------------------------------------|-------------|-------------|-----------------|--------------------------------|--------------------------------|
|         |    | <i>arpA</i>                                 | <i>chuA</i> | <i>yjaA</i> | <i>TspE4.C2</i> | <i>arpA</i> ( <i>ArpAgpC</i> ) | <i>arpA</i> ( <i>ArpAgpE</i> ) |
| BWO1    | B1 | +                                           | -           | -           | +               | +                              | -                              |
| BWO2    | B2 | -                                           | +           | +           | -               | -                              | -                              |
| BWO3    | B1 | +                                           | -           | -           | +               | +                              | -                              |
| CJO1    | B1 | +                                           | -           | -           | +               | -                              | -                              |
| CJO2    | A  | +                                           | -           | +           | -               | -                              | -                              |
| CMO1    | B1 | +                                           | -           | -           | +               | +                              | -                              |
| CMO2    | D  | +                                           | +           | -           | +               | +                              | -                              |
| CMK2    | B1 | +                                           | -           | -           | +               | +                              | -                              |
| DPO1    | C  | +                                           | -           | +           | -               | +                              | -                              |
| DPO2    | B1 | +                                           | -           | -           | +               | +                              | -                              |
| DPO3    | A  | +                                           | -           | +           | -               | -                              | -                              |
| FD1O1   | A  | +                                           | -           | -           | -               | +                              | -                              |
| FD2O1   | A  | +                                           | -           | -           | -               | -                              | -                              |
| FD2O2   | D  | +                                           | +           | -           | -               | +                              | -                              |
| FD3O1   | A  | +                                           | -           | -           | -               | -                              | -                              |
| FD3K2   | B2 | -                                           | +           | -           | +               | +                              | -                              |
| JAO1    | F  | -                                           | +           | -           | -               | +                              | -                              |
| JAO2    | A  | +                                           | -           | +           | -               | -                              | -                              |
| JAO3    | A  | +                                           | -           | -           | -               | -                              | -                              |
| JAN1    | A  | +                                           | -           | -           | -               | +                              | -                              |
| KAO1    | A  | +                                           | -           | -           | -               | -                              | -                              |
| KAO2    | B1 | +                                           | -           | -           | +               | +                              | -                              |
| KBO1    | A  | +                                           | -           | -           | -               | -                              | -                              |
| KBO2    | A  | +                                           | -           | -           | -               | -                              | -                              |
| MJO1    | C  | +                                           | -           | +           | -               | +                              | -                              |

|       |    |   |   |   |   |   |   |
|-------|----|---|---|---|---|---|---|
| MJO2  | A  | + | - | - | - | - | - |
| PT1O1 | B1 | + | - | - | + | + | - |
| PT1O2 | B1 | + | - | - | + | + | - |
| PT1K2 | B1 | + | - | - | + | + | - |
| PT1N1 | A  | + | - | - | - | - | - |
| PT1N2 | B1 | + | - | - | + | - | - |
| PT2O1 | D  | + | + | - | - | + | - |
| PT2K2 | D  | + | + | - | - | + | - |
| PT3K1 | D  | + | + | - | - | + | - |
| PT3K2 | E  | + | + | - | - | + | + |
| PWO1  | D  | + | + | - | - | + | - |
| PWO2  | C  | + | - | + | - | + | - |
| WWO1  | B1 | + | - | - | + | + | - |
| WWO2  | A  | + | - | - | - | + | - |
| ZMK1M | U  | + | - | + | + | + | - |
| ZMN1M | B2 | - | + | + | - | + | - |
| ZMN2M | F  | - | + | - | - | + | - |
| ZMN3M | D  | + | + | - | - | + | - |
| ZMNS2 | F  | - | + | - | - | + | - |

Ph – Phylo-group; U – Unknown;

Table S6. Characterization of *E. coli* isolates ambulatory patients with UTI symptoms (UTI)

| Strains | Ph | Genes amplified in quadruplex PCR reactions |             |             |                 | group C                        | group E                        |
|---------|----|---------------------------------------------|-------------|-------------|-----------------|--------------------------------|--------------------------------|
|         |    | <i>arpA</i>                                 | <i>chuA</i> | <i>yjaA</i> | <i>TspE4.C2</i> | <i>arpA</i> ( <i>ArpAgpC</i> ) | <i>arpA</i> ( <i>ArpAgpE</i> ) |
| UTI 1   | B2 | -                                           | +           | +           | -               | -                              | -                              |
| UTI 2   | B2 | -                                           | +           | +           | -               | -                              | -                              |
| UTI 3   | B2 | -                                           | +           | +           | -               | -                              | -                              |



|        |    |   |   |   |   |   |   |
|--------|----|---|---|---|---|---|---|
| UTI 4  | B2 | - | + | + | - | + | - |
| UTI 5  | B2 | - | + | + | + | + | - |
| UTI 6  | B2 | - | + | + | - | + | - |
| UTI 7  | B1 | + | - | - | + | + | - |
| UTI 8  | B2 | - | + | + | + | + | - |
| UTI 9  | B2 | - | + | - | + | + | - |
| UTI 10 | D  | + | + | - | - | + | - |
| UTI 11 | B2 | - | + | + | + | + | - |
| UTI 12 | B2 | - | + | + | + | + | - |
| UTI 13 | B2 | - | + | + | - | - | - |
| UTI 14 | B1 | + | - | - | + | - | - |
| UTI 15 | F  | - | + | - | - | - | - |
| UTI 16 | D  | + | + | - | - | + | - |
| UTI 17 | B2 | - | + | + | + | + | - |
| UTI 18 | B2 | - | + | + | + | + | - |
| UTI 19 | B2 | - | + | + | - | - | - |
| UTI 20 | D  | + | + | - | - | + | - |
| UTI 21 | B2 | - | + | + | - | - | - |
| UTI 22 | B2 | - | + | + | - | - | - |
| UTI 23 | B2 | - | + | + | - | + | - |
| UTI 24 | B2 | - | + | + | - | + | - |
| UTI 25 | B2 | - | + | + | + | + | - |
| UTI 26 | F  | - | + | - | - | + | - |
| UTI 27 | F  | - | + | - | - | + | - |
| UTI 28 | F  | - | + | - | - | - | - |
| UTI 29 | B2 | - | + | + | - | + | - |
| UTI 30 | B2 | - | + | + | - | - | - |
| UTI 31 | B2 | - | + | + | - | + | - |
| UTI 32 | B2 | - | + | + | - | + | - |
| UTI 33 | B2 | - | + | + | - | - | - |

|        |    |   |   |   |   |   |   |
|--------|----|---|---|---|---|---|---|
| UTI 34 | B2 | - | + | + | + | + | - |
| UTI 35 | E  | + | + | - | - | + | + |
| UTI 36 | D  | + | + | - | - | + | - |
| UTI 37 | B2 | - | + | + | - | - | - |
| UTI 38 | B2 | - | + | + | + | + | - |
| UTI 39 | F  | - | + | - | - | - | - |
| UTI 40 | B2 | - | + | + | - | - | - |
| UTI 41 | B2 | - | + | + | - | - | - |
| UTI 42 | C  | + | - | + | - | + | - |
| UTI 43 | B2 | - | + | + | - | + | - |
| UTI 44 | D  | + | + | - | - | + | - |
| UTI 45 | D  | + | + | - | + | + | - |
| UTI 46 | D  | + | + | - | - | + | - |
| UTI 47 | A  | + | - | - | - | + | - |
| UTI 48 | B2 | - | + | + | + | - | - |
| UTI 49 | B2 | - | + | + | + | - | - |
| UTI 81 | C  | + | - | + | - | + | + |

---

Ph – Phylo-group;

Table S7. Characterization of *E. coli* isolates from food (FOOD)

| Strains | Ph | Genes amplified in quadruplex PCR reactions |             |             |                 | group C                           | group E                           |
|---------|----|---------------------------------------------|-------------|-------------|-----------------|-----------------------------------|-----------------------------------|
|         |    | <i>arpA</i>                                 | <i>chuA</i> | <i>yjaA</i> | <i>TspE4.C2</i> | <i>arpA</i><br>( <i>ArpAgpC</i> ) | <i>arpA</i><br>( <i>ArpAgpE</i> ) |
| FOOD 2  | B1 | +                                           | -           | -           | +               | +                                 | +                                 |
| FOOD 3  | F  | -                                           | +           | -           | -               | +                                 | -                                 |
| FOOD 5  | A  | +                                           | -           | -           | -               | -                                 | -                                 |
| FOOD 6  | A  | +                                           | -           | -           | -               | -                                 | -                                 |
| FOOD 10 | B1 | +                                           | -           | -           | +               | +                                 | -                                 |

|         |    |   |   |   |   |   |   |
|---------|----|---|---|---|---|---|---|
| FOOD 11 | F  | - | + | - | - | + | - |
| FOOD 12 | A  | + | - | - | - | - | - |
| FOOD 13 | A  | + | - | - | - | - | - |
| FOOD 15 | A  | + | - | - | - | - | - |
| FOOD 16 | U  | - | - | + | + | - | - |
| FOOD 18 | A  | + | - | - | - | - | - |
| FOOD 19 | A  | + | - | - | - | - | - |
| FOOD 20 | B1 | + | - | - | + | + | - |
| FOOD 21 | A  | + | - | - | - | - | - |
| FOOD 22 | A  | + | - | - | - | - | - |
| FOOD 23 | U  | + | - | + | + | + | - |
| FOOD 24 | A  | + | - | - | - | - | - |
| FOOD 25 | A  | + | - | - | - | + | - |
| FOOD 27 | B1 | + | - | - | + | + | - |
| FOOD 28 | B1 | + | - | - | + | + | - |
| FOOD 29 | U  | + | - | + | + | + | - |
| FOOD 30 | B1 | + | - | - | + | - | - |
| FOOD 31 | A  | + | - | - | - | + | - |
| FOOD 33 | A  | + | - | - | - | + | - |
| FOOD 34 | E  | + | + | - | + | + | + |
| FOOD 35 | B1 | + | - | - | + | + | - |
| FOOD 36 | F  | - | + | - | - | - | - |
| FOOD 38 | U  | + | - | + | + | + | - |
| FOOD 41 | B1 | + | - | - | + | + | - |
| FOOD 42 | F  | - | + | - | - | + | - |
| FOOD 43 | A  | + | - | - | - | + | + |
| FOOD 44 | A  | + | - | - | - | - | - |
| FOOD 45 | A  | + | - | - | - | + | - |
| FOOD 46 | A  | + | - | + | - | - | - |
| FOOD 48 | A  | + | - | + | - | - | - |

|           |   |   |   |   |   |   |   |
|-----------|---|---|---|---|---|---|---|
| FOOD 19 S | A | + | - | - | - | + | - |
| FOOD 115N | A | + | - | - | - | + | - |
| FOOD 119N | A | + | - | + | - | - | - |

Ph – Phylo-group; U – Unknown;

Table S8. Antibiotic resistance of *E. coli* strains isolated from various sources

| Antimicrobials | Source (number of isolates) |               |               |
|----------------|-----------------------------|---------------|---------------|
|                | Poultry farm                | FOOD          | Patients/UTIs |
|                | (44)<br>n (%)               | (38)<br>n (%) | (50)<br>n (%) |
| AMP            | 19(43.2)                    | 18(47.4)      | 19(38.0)      |
| TE             | 13(29.5)                    | 18(47.4)      | 17(34.0)      |
| SXT            | 10(22.7)                    | 13(34.2)      | 15(30.0)      |
| CIP            | 6(13.6)                     | 13(34.2)      | 7(14.0)       |
| PRL            | 6(13.6)                     | 1(2.6)        | 6(12.0)       |
| C              | 6(13.6)                     | 1(2.6)        | 2(4.0)        |
| AMC            | 2(4.5)                      | 0             | 2(4.0)        |
| CXM            | 1(2.3)                      | 0             | 1(2.0)        |
| GE             | 1(2.3)                      | 0             | 0             |
| NF             | 0                           | 0             | 2(4.0)        |
| TZP            | 0                           | 0             | 0             |
| CTX            | 2(4.5)                      | 0             | 0             |
| CAZ            | 0                           | 0             | 0             |
| MEM            | 0                           | 0             | 0             |
| IPM            | 0                           | 0             | 0             |
| AK             | 0                           | 1(2.6)        | 0             |

Note: AMP - Ampicillin 10, TE - Tetracycline 30, SXT - Trimethoprim-Sulfamethoxazole 1.25/23.75, CIP - Ciprofloxacin, PRL - Piperacillin 100, C - Chloramphenicol 30, AMC - Amoxicillin/clavulanic acid 20/10, CXM - Cefuroxime 30, GE - Gentamicin 10, NF - Nitrofurantoin 300, TZP - Piperacillin/Tazobactam 100/10, CTX - Cefotaxime 30, CAZ - Ceftazidime 30, MEM - Meropenem 10, IPM - Imipenem 10, AK - Amikacin 30;

Table S9. Genotypic and phenotypic characterization of E. coli isolates ambulatory patients with UTI symptoms (UTI)

| No./<br>patient<br>sex | Strains | Ph | Virulence/profiles |             |            |            |            |               |            |            | Resistance/patterns    |
|------------------------|---------|----|--------------------|-------------|------------|------------|------------|---------------|------------|------------|------------------------|
|                        |         |    | Adhesins           |             |            | Toxins     |            | Miscellaneous |            |            |                        |
|                        |         |    | <i>fimH</i>        | <i>papC</i> | <i>iha</i> | <i>vat</i> | <i>pic</i> | <i>irp2</i>   | <i>iss</i> | <i>usp</i> |                        |
| 1/F                    | UTI 40  | B2 | ■                  |             |            | ■          | ■          | ■             |            | ■          |                        |
| 2/F                    | UTI 10  | D  | ■                  |             |            |            |            | ■             |            | ■          | AMP                    |
| 3/F                    | UTI 11  | B2 | ■                  |             | ■          |            |            | ■             |            | ■          | CIP                    |
| 4/F                    | UTI 13  | B2 | ■                  | ■           | ■          | ■          | ■          | ■             | ■          | ■          |                        |
| 5/F                    | UTI 14  | B1 | ■                  |             | ■          |            |            | ■             | ■          | ■          | TE                     |
| 6/F                    | UTI 15  | F  | ■                  |             |            | ■          |            | ■             | ■          | ■          | TE                     |
| 7/F                    | UTI 18  | B2 | ■                  | ■           | ■          | ■          | ■          | ■             |            | ■          |                        |
| 8/F                    | UTI 19  | B2 | ■                  | ■           |            |            | ■          | ■             |            | ■          |                        |
| 9/F                    | UTI 20  | D  | ■                  | ■           | ■          | ■          | ■          | ■             | ■          | ■          |                        |
| 10/F                   | UTI 23  | B2 | ■                  | ■           |            | ■          |            | ■             |            | ■          |                        |
| 11/F                   | UTI 24  | B2 | ■                  | ■           | ■          |            |            | ■             |            | ■          | AMP/TE/C               |
| 12/F                   | UTI 25  | B2 | ■                  | ■           |            |            |            | ■             |            | ■          |                        |
| 13/F                   | UTI 26  | F  | ■                  | ■           |            |            |            | ■             |            | ■          |                        |
| 14/F                   | UTI 29  | B2 | ■                  | ■           |            | ■          | ■          | ■             |            | ■          | AMP/TE                 |
| 15/F                   | UTI 31  | B2 | ■                  | ■           |            | ■          | ■          | ■             |            | ■          | AMP/SXT                |
| 16/F                   | UTI 32  | B2 | ■                  | ■           |            | ■          | ■          | ■             |            | ■          | AMP/SXT                |
| 17/F                   | UTI 34  | B2 | ■                  | ■           | ■          | ■          | ■          | ■             |            | ■          |                        |
| 18/F                   | UTI 35  | E  | ■                  | ■           |            | ■          | ■          | ■             | ■          | ■          | AMP, TE, SXT, CIP, PRL |
| 19/F                   | UTI 36  | D  | ■                  | ■           |            | ■          | ■          | ■             | ■          | ■          | AMP/TE/SXT/CIP         |
| 20/F                   | UTI 37  | B2 | ■                  | ■           |            | ■          |            | ■             |            | ■          |                        |
| 21/F                   | UTI 38  | B2 | ■                  | ■           |            | ■          |            | ■             |            | ■          |                        |
| 22/F                   | UTI 39  | F  | ■                  | ■           |            | ■          |            | ■             |            | ■          |                        |
| 23/F                   | UTI 4   | B2 | ■                  | ■           |            | ■          | ■          | ■             |            | ■          |                        |
| 24/F                   | UTI 41  | B2 | ■                  | ■           |            | ■          |            | ■             |            | ■          | TE                     |
| 25/F                   | UTI 43  | B2 | ■                  | ■           | ■          | ■          |            | ■             |            | ■          | AMP/TE/PRL             |
| 26/F                   | UTI 45  | D  | ■                  | ■           |            | ■          | ■          | ■             | ■          | ■          | TE/SXT                 |
| 27/F                   | UTI 46  | D  | ■                  |             |            |            |            | ■             | ■          | ■          | AMP/PRL                |

|               |               |    |              |              |              |              |              |              |              |              |                          |
|---------------|---------------|----|--------------|--------------|--------------|--------------|--------------|--------------|--------------|--------------|--------------------------|
| 28/F          | UTI 49        | B2 | ■            |              | ■            | ■            |              | ■            | ■            | ■            | SXT                      |
| 29/F          | UTI 5         | B2 | ■            | ■            | ■            | ■            | ■            | ■            |              | ■            |                          |
| 30/F          | UTI 7         | B1 | ■            |              |              | ■            |              | ■            | ■            | ■            | AMP/TE/SXT/CIP           |
| 31/F          | UTI 8         | B2 | ■            | ■            | ■            | ■            |              | ■            |              | ■            |                          |
| 32/F          | UTI 9         | B2 |              |              |              | ■            |              | ■            | ■            | ■            | AMP/TE/SXT               |
| 33/F          | UTI 1         | B2 | ■            | ■            | ■            | ■            | ■            | ■            |              | ■            | SXT                      |
| n(%) 33(66.0) |               |    | 32           | 24           | 12           | 25           | 15           | 33           | 11           | 33           | MDR(n=6)                 |
| 34/M          | UTI 12        | B2 | ■            | ■            | ■            | ■            | ■            | ■            |              | ■            | AMP/AMC/SX/PRL           |
| 35/M          | UTI 16        | D  | ■            |              |              |              |              | ■            |              | ■            | AMP/SXT                  |
| 36/M          | UTI 17        | B2 | ■            |              |              | ■            | ■            | ■            |              | ■            |                          |
| 37/M          | UTI 21        | B2 | ■            | ■            |              | ■            |              | ■            |              | ■            |                          |
| 38/M          | UTI 22        | B2 | ■            | ■            | ■            | ■            | ■            | ■            |              | ■            | NF                       |
| 39/M          | UTI 27        | F  | ■            | ■            |              |              |              | ■            |              | ■            |                          |
| 40/M          | UTI 28        | F  | ■            | ■            |              | ■            |              | ■            |              | ■            | AMP                      |
| 41/M          | UTI 3         | B2 | ■            | ■            |              | ■            | ■            | ■            |              | ■            |                          |
| 42/M          | UTI 30        | B2 | ■            | ■            |              | ■            |              | ■            | ■            | ■            | AMP                      |
| 43/M          | UTI 33        | B2 | ■            | ■            | ■            | ■            | ■            | ■            | ■            | ■            |                          |
| 44/M          | UTI 42        | C  | ■            | ■            |              | ■            | ■            | ■            | ■            | ■            | AMP/TE/SXT/CIP/NF        |
| 45/M          | UTI 44        | D  | ■            | ■            |              |              |              | ■            | ■            | ■            | AMP/SXT                  |
| 46/M          | UTI 47        | A  | ■            |              |              |              |              |              | ■            |              | AMC/TE/SXT/CIP/PRL/C     |
| 47/M          | UTI 48        | B2 | ■            | ■            |              | ■            |              | ■            |              | ■            | TE                       |
| 48/M          | UTI 6         | B2 | ■            | ■            |              |              |              | ■            |              | ■            | TE                       |
| 49/M          | UTI 81        | C  | ■            |              |              | ■            | ■            |              |              | ■            | TE/SXT/CIP/PRL/ESBL+     |
| 50/M          | UTI 2         | B2 | ■            | ■            |              | ■            | ■            | ■            |              | ■            | AMP/TE                   |
| n(%) 17(34.0) |               |    | 17           | 13           | 3            | 12           | 8            | 15           | 5            | 16           | MDR(n=4)                 |
| Total<br>n(%) | 50<br>(100.0) |    | 49<br>(98.0) | 37<br>(74.0) | 15<br>(30.0) | 37<br>(74.0) | 23<br>(46.0) | 48<br>(96.0) | 16<br>(32.0) | 49<br>(98.0) | MDR total n=10<br>(20.0) |

Patient

sex: F – female, M – male; Ph – Phylogroup; U – Unknown

Note: MDR–multidrug resistance; AMP–ampicillin, TE–tetracycline, SXT–trimethoprim/sulfamethoxazole, CIP–ciprofloxacin, PRL–piperacillin, C–chloramphenicol, AMC–amoxicillin/clavulanic acid, CXM–cefuroxime, NF–nitrofurantoin;

Table S10. Genotypic and phenotypic characterization of *E. coli* isolates from food (FOOD)

| No./<br>Source of<br>meet | Strains  | Ph | Virulence/profiles |             |            |            |            |               |            |            | Resistance/patterns |
|---------------------------|----------|----|--------------------|-------------|------------|------------|------------|---------------|------------|------------|---------------------|
|                           |          |    | Adhesins           |             |            | Toxins     |            | Miscellaneous |            |            |                     |
|                           |          |    | <i>fimH</i>        | <i>papC</i> | <i>iha</i> | <i>vat</i> | <i>pic</i> | <i>irp2</i>   | <i>iss</i> | <i>usp</i> |                     |
| 1/h                       | FOOD10   | B1 | ■                  |             |            |            |            |               |            | ■          | AMP/TE              |
| 2/h                       | FOOD11   | F  | ■                  |             |            | ■          | ■          | ■             | ■          | ■          | AMP/TE/CIP          |
| 3/h                       | FOOD16   | U  |                    | ■           |            |            |            | ■             |            | ■          | CIP                 |
| 4/h                       | FOOD2    | B1 | ■                  |             |            |            |            |               |            | ■          |                     |
| 5/h                       | FOOD20   | B1 | ■                  | ■           |            |            | ■          | ■             | ■          | ■          | CIP                 |
| 6/h                       | FOOD21   | A  | ■                  | ■           |            |            | ■          | ■             |            | ■          |                     |
| 7/h                       | FOOD22   | A  | ■                  | ■           |            |            | ■          | ■             |            | ■          |                     |
| 8/h                       | FOOD28   | B1 | ■                  | ■           | ■          |            | ■          |               | ■          | ■          | AMP/TE/CIP          |
| 9/h                       | FOOD29   | U  | ■                  | ■           |            |            | ■          |               | ■          | ■          |                     |
| 10/h                      | FOOD3    | F  | ■                  |             |            | ■          | ■          | ■             | ■          | ■          | AMP/TE              |
| 11/h                      | FOOD31   | A  | ■                  | ■           |            |            | ■          |               | ■          |            |                     |
| 12/h                      | FOOD33   | A  | ■                  | ■           |            |            | ■          | ■             | ■          |            | AMP/TE/SXT/CIP      |
| 13/h                      | FOOD34   | E  |                    | ■           |            |            | ■          |               | ■          | ■          | AMP/TE/SXT/CIP      |
| 14/h                      | FOOD38   | U  | ■                  | ■           |            |            | ■          | ■             | ■          |            |                     |
| 15/h                      | FOOD41   | B1 | ■                  | ■           |            |            | ■          | ■             | ■          |            | AMP/TE/SXT/CIP/C    |
| 16/h                      | FOOD42   | F  | ■                  | ■           |            | ■          | ■          | ■             | ■          |            | TE/CIP              |
| 17/h                      | FOOD44   | A  | ■                  | ■           |            |            | ■          | ■             | ■          |            | AMP/TE/SXT/CIP      |
| 18/h                      | FOOD45   | A  | ■                  |             |            |            |            | ■             | ■          |            | AMP/TE/SXT/CIP      |
| 19/h                      | FOOD46   | A  | ■                  | ■           | ■          |            | ■          | ■             | ■          |            | AMP/SXT             |
| 20/h                      | FOOD48   | A  | ■                  | ■           |            |            | ■          |               | ■          | ■          | AMP/TE/SXT/CIP      |
| 21/h                      | FOOD5    | A  |                    |             |            |            |            |               |            |            |                     |
| 22/h                      | FOOD6    | A  |                    |             |            |            |            |               |            | ■          |                     |
| n(%)                      | 22(57.9) |    | 18                 | 15          | 2          | 3          | 16         | 13            | 15         | 13         | MDR(n=8)            |



|               |             |    |              |              |             |             |              |              |              |              |                          |
|---------------|-------------|----|--------------|--------------|-------------|-------------|--------------|--------------|--------------|--------------|--------------------------|
| 23/p          | FOOD115N    | A  | ■            | ■            |             |             | ■            | ■            | ■            |              | AMP/TE/SXT/CIP           |
| 24/p          | FOOD12      | A  | ■            |              |             |             |              |              |              | ■            |                          |
| 25/p          | FOOD13      | A  | ■            |              |             |             | ■            | ■            |              | ■            |                          |
| 26/p          | FOOD15      | A  | ■            |              |             |             |              |              | ■            | ■            |                          |
| 27/p          | FOOD18      | A  | ■            | ■            |             |             | ■            | ■            | ■            | ■            |                          |
| 28/p          | FOOD19      | A  | ■            | ■            |             |             | ■            | ■            |              | ■            |                          |
| 29/p          | FOOD25      | A  | ■            | ■            |             |             |              | ■            | ■            | ■            |                          |
| 30/p          | FOOD27      | B1 | ■            | ■            | ■           |             | ■            | ■            | ■            | ■            |                          |
| 31/p          | FOOD36      | F  | ■            | ■            |             |             | ■            |              | ■            |              | AMP/TE/SXT/CIP           |
| 32/p          | FOOD43      | A  | ■            | ■            |             |             | ■            | ■            | ■            |              | AMP/TE                   |
| n(%)          | 10(26.3)    |    | 10           | 7            | 1           | 0           | 7            | 7            | 7            | 7            | MDR(n=2)                 |
| 33/t          | FOOD23      | U  | ■            | ■            |             | ■           | ■            | ■            |              | ■            |                          |
| 34/t          | FOOD24      | A  | ■            | ■            |             |             |              |              | ■            | ■            | AMP/TE/SXT/CIP           |
| 35/t          | FOOD30      | B1 | ■            | ■            | ■           |             | ■            |              | ■            | ■            | AMP                      |
| 36/t          | FOOD35      | B1 | ■            | ■            | ■           |             | ■            |              | ■            |              | AMP/TE/SXT/CIP/PRL/AK    |
| n(%)          | 4(10.5)     |    | 4            | 4            | 2           | 1           | 3            | 1            | 3            | 3            | MDR(n=2)                 |
| 37/b          | FOOD119N    | A  | ■            | ■            | ■           |             | ■            |              | ■            |              | TE/SXT/CIP               |
| 38/b          | FOOD19S     | A  | ■            | ■            | ■           |             | ■            | ■            | ■            |              | AMP/TE/SXT/CIP           |
| n(%)          | 2(5.3)      |    | 2            | 2            | 2           | 0           | 2            | 1            | 2            | 0            | MDR(n=2)                 |
| Total<br>(n)% | 38<br>(100) |    | 34<br>(89.5) | 28<br>(73.7) | 7<br>(18.4) | 4<br>(10.5) | 28<br>(73.7) | 22<br>(57.9) | 27<br>(71.1) | 23<br>(60.5) | MDR total n=14<br>(36.8) |

Type of meat: h–chicken, p–pork, t–turkey, b–beef;

Ph – Phylogroup; U – Unknown

Note: MDR–multidrug resistance; AMP–ampicillin, TE–tetracycline, SXT–trimethoprim/sulfamethoxazole, CIP–ciprofloxacin, PRL–piperacillin, C–chloramphenicol, AMC–amoxicillin/clavulanic acid, AK–amikacin;

Table S11. Genotypic and phenotypic characterization of *E. coli* isolates from poultry farms (Poultry farm – AFEC))

| No./<br>Farming<br>system | Strains | Ph | Virulence/profiles |             |            |            |            |               |            |            | Resistance/patterns |
|---------------------------|---------|----|--------------------|-------------|------------|------------|------------|---------------|------------|------------|---------------------|
|                           |         |    | Adhesins           |             |            | Toxins     |            | Miscellaneous |            |            |                     |
|                           |         |    | <i>fimH</i>        | <i>papC</i> | <i>iha</i> | <i>vat</i> | <i>pic</i> | <i>irp2</i>   | <i>iss</i> | <i>usp</i> |                     |
| 1/f                       | JA01    | F  | ■                  | ■           |            |            |            | ■             | ■          |            |                     |
| 2/f                       | JA02    | A  | ■                  | ■           |            |            | ■          | ■             | ■          | ■          |                     |
| 3/f                       | JA03    | A  | ■                  | ■           |            |            | ■          | ■             | ■          | ■          |                     |
| 4/f                       | JAN1    | A  | ■                  |             |            |            |            | ■             | ■          |            |                     |
| 5/f                       | KA01    | A  | ■                  | ■           |            |            |            |               |            |            |                     |
| 6/f                       | KA02    | B1 | ■                  | ■           |            |            | ■          | ■             | ■          | ■          |                     |
| 7/f                       | KB01    | A  | ■                  |             |            |            |            |               |            | ■          |                     |
| 8/f                       | KB02    | A  | ■                  | ■           |            |            | ■          | ■             | ■          | ■          |                     |
| n(%)                      | 8(18.2) |    | 8                  | 6           | 0          | 0          | 4          | 6             | 6          | 5          | MDR(n=0)            |
| 9/df                      | PT101   | B1 | ■                  |             |            |            |            |               | ■          | ■          | AMP/GE              |
| 10/df                     | PT102   | B1 | ■                  |             |            |            | ■          | ■             | ■          | ■          | AMP                 |
| 11/df                     | PT1K2   | B1 | ■                  |             |            |            | ■          | ■             | ■          | ■          | AMP/TE/SXT/CIP/C    |
| 12/df                     | PT1N1   | A  | ■                  |             |            |            |            |               |            |            | AMP/TE/PRL          |
| 13/df                     | PT1N2   | B1 | ■                  |             |            |            | ■          | ■             | ■          | ■          | AMP/TE/PRL          |
| 14/df                     | PT201   | D  | ■                  |             |            |            |            |               |            |            |                     |
| 15/df                     | PT2K2   | D  | ■                  | ■           |            | ■          | ■          | ■             | ■          | ■          |                     |
| 16/df                     | PT3K1   | D  | ■                  |             |            |            |            |               |            | ■          |                     |
| 17/df                     | PT3K2   | E  | ■                  | ■           |            |            | ■          | ■             | ■          | ■          | AMP/TE/CIP/C        |
| n(%)                      | 9(20.5) |    | 9                  | 2           | 0          | 1          | 5          | 5             | 6          | 7          | MDR(n=4)            |
| 18/d                      | CJ01    | B1 | ■                  |             |            |            |            |               |            |            |                     |
| 19/d                      | CJ02    | A  | ■                  | ■           |            | ■          | ■          | ■             | ■          | ■          | AMP/TE/PRL          |
| 20/d                      | FD101   | A  | ■                  |             |            |            | ■          | ■             |            |            |                     |
| 21/d                      | FD201   | A  | ■                  |             |            |            |            | ■             |            |            | AMP/CIP/C           |
| 22/d                      | FD202   | D  | ■                  | ■           |            |            | ■          | ■             | ■          | ■          | TE/SXT/ESBL+        |
| 23/d                      | FD301   | A  | ■                  |             |            |            |            | ■             | ■          |            | AMP/TE/SXT/CIP      |

|               |             |    |              |              |            |            |              |              |              |              |                           |
|---------------|-------------|----|--------------|--------------|------------|------------|--------------|--------------|--------------|--------------|---------------------------|
| 24/d          | FD3K2       | B2 | ■            |              |            |            | ■            | ■            | ■            | ■            | TE/SXT/CIP/C/ESBL+        |
| 25/d          | PW01        | D  | ■            |              |            |            |              |              | ■            |              | AMP/TE/SXT                |
| 26/d          | PW02        | C  | ■            | ■            |            |            | ■            | ■            | ■            | ■            |                           |
| n(%)          | 9(20.5)     |    | 9            | 3            | 0          | 1          | 5            | 7            | 6            | 4            | MDR(n=6)                  |
| 27/c          | BW01        | B1 |              | ■            |            |            |              |              | ■            |              | AMP                       |
| 28/c          | BW02        | B2 | ■            | ■            |            |            | ■            | ■            | ■            | ■            |                           |
| 29/c          | BW03        | B1 | ■            |              |            |            | ■            | ■            | ■            | ■            |                           |
| 30/c          | CM01        | B1 |              |              |            |            |              | ■            | ■            |              | AMP/SXT/C                 |
| 31/c          | CM02        | D  | ■            | ■            |            |            | ■            | ■            | ■            | ■            | AMP/TE/SXT/PRL            |
| 32/c          | CMK2        | B1 | ■            | ■            |            |            | ■            | ■            | ■            |              | AMP/TE/SXT/PRL            |
| 33/c          | DP01        | C  | ■            | ■            |            |            |              |              |              |              |                           |
| 34/c          | DP02        | B1 | ■            | ■            | ■          |            | ■            | ■            | ■            | ■            | TE/SXT                    |
| 35/c          | DP03        | A  | ■            |              |            |            | ■            | ■            | ■            | ■            | AMP                       |
| 36/c          | MJ01        | C  | ■            | ■            |            |            |              | ■            |              |              |                           |
| 37/c          | MJ02        | A  | ■            | ■            |            |            | ■            | ■            | ■            |              |                           |
| 38/c          | WW01        | B1 | ■            |              |            |            |              | ■            |              |              | AMP                       |
| 39/c          | WW02        | A  | ■            | ■            |            |            | ■            | ■            | ■            | ■            |                           |
| 40/c          | ZMK1M       | U  | ■            |              |            |            |              |              |              |              |                           |
| 41/c          | ZMN1M       | B2 | ■            | ■            |            |            |              | ■            | ■            | ■            |                           |
| 42/c          | ZMN2M       | F  | ■            | ■            |            | ■          | ■            | ■            | ■            | ■            |                           |
| 43/c          | ZMN2S       | F  | ■            | ■            |            |            | ■            | ■            | ■            | ■            |                           |
| 44/c          | ZMN3M       | D  | ■            |              |            | ■          | ■            | ■            | ■            | ■            | AMP/TE/SXT/CIP/C          |
| n(%)          | 18(40.9)    |    | 16           | 12           | 1          | 2          | 11           | 15           | 14           | 10           | MDR(n=4)                  |
| Total<br>n(%) | 44<br>(100) |    | 42<br>(95.5) | 23<br>(52.3) | 1<br>(2.3) | 4<br>(9.1) | 25<br>(56.8) | 33<br>(75.0) | 32<br>(72.7) | 26<br>(59.1) | MDR total n=14<br>(31.8%) |

Farming system: c – cage, d –deep litter, f – free-range, df – deep litter and free-range;

Ph – Phylogroup; U – Unknown

Note: MDR–multidrug resistance; AMP-ampicillin, TE-tetracycline, SXT-trimethoprim/sulfamethoxazole, CIP-ciprofloxacin, PRL-piperacillin, C-chloramphenicol, AMC-amoxicillin/clavulanic acid, CXM-cefuroxime, GE-gentamicin, CTX-cefotaxime;

Table S12. ERIC-PCR profiles and STs (MLST) with the highest number of similarities among *E. coli* isolates

| Cluster/<br>ERIC | Strains/<br>MLST (ST)  | Virulence/profiles |            |             |            |             |            |            |            | Resistance/patterns    |
|------------------|------------------------|--------------------|------------|-------------|------------|-------------|------------|------------|------------|------------------------|
|                  |                        | <i>fimH</i>        | <i>usp</i> | <i>irp2</i> | <i>vat</i> | <i>papC</i> | <i>pic</i> | <i>iss</i> | <i>iha</i> |                        |
| EI               | WW01/ST1049            | ■                  |            | ■           |            |             |            |            |            | AMP                    |
|                  | FOOD 28(h)/U           | ■                  | ■          |             |            | ■           | ■          | ■          | ■          | AMP/TE/CIP             |
| EII              | KA01/U                 | ■                  |            |             |            | ■           |            |            |            | -                      |
|                  | FOOD 29(h)/U           | ■                  | ■          |             |            | ■           | ■          | ■          |            | -                      |
| EIII             | CM02/U                 | ■                  | ■          | ■           |            | ■           | ■          | ■          |            | AMP/TE/SXT/PRL         |
|                  | DP01/U                 | ■                  |            |             |            | ■           |            |            |            | -                      |
|                  | UTI 16/ST69            | ■                  | ■          | ■           |            |             |            |            |            | AMP/SXT                |
| EIV              | CJ01/ST2534            | ■                  |            |             |            |             |            |            |            | -                      |
|                  | FOOD 23(t)/U           | ■                  | ■          | ■           | ■          | ■           | ■          |            |            | -                      |
| EV               | UTI 28/U               | ■                  | ■          | ■           | ■          | ■           |            |            |            | AMP                    |
|                  | FOOD 21(h)/ST536       | ■                  | ■          | ■           |            | ■           | ■          |            |            | -                      |
| EVI              | PT1N1/U                | ■                  |            |             |            |             |            |            |            | AMP/SXT                |
|                  | FOOD 25(p)/<br>ST10888 | ■                  | ■          | ■           |            | ■           |            | ■          |            | -                      |
| EVII             | MJ01/U                 | ■                  |            | ■           |            | ■           |            |            |            | -                      |
|                  | FOOD 35(t)/U           | ■                  |            |             |            | ■           | ■          | ■          | ■          | AMP/TE/CIP/ SXT/PRL/AK |
| EVIII            | WW02/ST212             | ■                  | ■          | ■           |            | ■           | ■          | ■          |            | -                      |
|                  | FOOD 10(h)/<br>ST6073  | ■                  | ■          |             |            |             |            |            |            | AMP/TE                 |
| EIX              | FD202/ST5451           | ■                  | ■          | ■           |            | ■           | ■          | ■          |            | TE/SXT/ESBL+           |
|                  | FD3K2/ST624            | ■                  | ■          | ■           |            |             | ■          | ■          |            | TE/CIP/SXT/C/ESBL+     |

|     |                    |               |                   |
|-----|--------------------|---------------|-------------------|
|     | UTI 9/ST354        | ■ ■ ■ ■ ■     | AMP/TE/SXT        |
|     | UTI 31/ST404       | ■ ■ ■ ■ ■ ■   | AMP/SXT           |
| EX  | UTI 7/U            | ■ ■ ■ ■ ■     | AMP/TE/CIP/SXT    |
|     | FOOD 38(h)/U       | ■ ■ ■ ■ ■ ■   | -                 |
| EXI | UTI 42/U           | ■ ■ ■ ■ ■ ■ ■ | AMP/TE/CIP/NF/SXT |
|     | FOOD 19s(b)/ST5295 | ■ ■ ■ ■ ■ ■ ■ | AMP/TE/CIP/SXT    |

Note: ■ – positive result (presence of gene); ST – sequence type (MLST); U – unknown ST;  
AMP-ampicillin, TE-tetracycline, SXT-trimethoprim/sulfamethoxazole, CIP-ciprofloxacin, PRL-piperacillin, C-chloramphenicol, AMC-amoxicillin/clavulanic acid, CXM-cefuroxime, NF-nitrofurantoin, CTX-cefotaxime, AK-amikacin;  
Type of meat: h-chicken, p-pork, t-turkey, b-beef;

Table S13. The allelic profiles of seven housekeeping genes: *adh*, *gyrB*, *fumC*, *icd*, *mdh*, *purA* and *recA* (variants of alleles marked in blue, which repeat among the tested strains) of 25 *E. coli* strains isolated from poultry farms, food, and patients with UTI symptoms. The sequence types (ST) highlighted in red (seven housekeeping genes) and sequence types highlighted in green (six housekeeping genes)

| ID          | MLST (7) | MLST (6) | <i>icd</i> | <i>fumC</i> | <i>gyrB</i> | <i>purA</i> | <i>adk</i> | <i>mdh</i> | <i>recA</i> |
|-------------|----------|----------|------------|-------------|-------------|-------------|------------|------------|-------------|
| FOOD 10(h)  | U        | ST6073   | 619        | 19          | 14          | 12          | 842        | 11         | 2           |
| FOOD 19s(b) | ST5295   | ST5295   | 1          | 126         | 5           | 8           | 64         | 8          | 6           |
| FOOD 21(h)  | U        | ST536    | 95         | 107         | 1           | 8           | 502        | 69         | 20          |
| FOOD 23(t)  | U        | U        | 1          | 7           | 5           | 18          | 842        | 8          | 2           |
| FOOD 25(p)  | ST10888  | ST10888  | 1273       | 11          | 5           | 8           | 112        | 8          | 86          |
| FOOD 28(h)  | U        | U        | 18         | 19          | 33          | 122         | 457        | 9          | 6           |
| FOOD 29(h)  | U        | U        | 8          | 11          | 4           | 8           | 232        | 8          | 49          |
| FOOD 35(t)  | U        | U        | 26         | 65          | 32          | 8           | 502        | 9          | 2           |
| FOOD 38(h)  | U        | U        | 613        | 11          | 4           | 8           | 623        | 8          | 49          |
| UTI 7       | U        | U        | 1          | 65          | 5           | 13          | 457        | 9          | 6           |
| UTI 9       | ST354    | ST354    | 29         | 88          | 78          | 58          | 85         | 59         | 62          |
| UTI 16      | ST69     | ST69     | 6          | 35          | 27          | 5           | 21         | 5          | 4           |
| UTI 28      | U        | U        | 13         | 40          | 311         | 28          | 53         | 36         | 29          |
| UTI 31      | ST404    | ST404    | 14         | 14          | 10          | 7           | 14         | 17         | 74          |
| UTI 42      | U        | U        | 8          | 11          | 135         | 8           | 864        | 8          | 2           |
| DPO1(c)     | U        | U        | 8          | 81          | 4           | 8           | 623        | 12         | 2           |
| CMO2(c)     | U        | U        | 6          | 35          | 27          | 5           | 864        | 5          | 4           |
| FD3K2(d)    | ST624    | ST624    | 96         | 4           | 87          | 58          | 92         | 70         | 91          |
| FD202(d)    | ST5451   | ST5451   | 342        | 3           | 234         | 5           | 35         | 5          | 302         |
| CJO1(d)     | ST2534   | ST2534   | 88         | 19          | 15          | 193         | 137        | 7          | 7           |
| KA01(f)     | U        | U        | 88         | 4           | 15          | 8           | 457        | 80         | 14          |
| MJO1(c)     | U        | U        | 564        | 1054        | 60          | 8           | 174        | 509        | 677         |
| PT1N1(df)   | U        | U        | 1          | 65          | 5           | 13          | 457        | 9          | 6           |
| WWO1(c)     | U        | ST1049   | 16         | 4           | 14          | 5           | 46         | 24         | 14          |
| WWO2(c)     | U        | ST212    | 18         | 29          | 4           | 8           | 502        | 11         | 6           |

Note: U – unknown ST; Farming system: c – cage, d –deep litter, f – free-range, df – deep litter and free-range;  
Type of meat: h–chicken, p–pork, t–turkey, b–beef;

Table S14. STs (MLST) and phylogroups (Clermont) among 25 *E. coli* isolates

| MLST/<br>Branch | Strains/<br>ST/Ph      | Virulence/profiles |            |             |            |             |            |            |            | Resistance/patterns    |
|-----------------|------------------------|--------------------|------------|-------------|------------|-------------|------------|------------|------------|------------------------|
|                 |                        | <i>fimH</i>        | <i>usp</i> | <i>irp2</i> | <i>vat</i> | <i>papC</i> | <i>pic</i> | <i>iss</i> | <i>iha</i> |                        |
| I               | WW02/ST212/A           | ■                  | ■          | ■           |            | ■           | ■          | ■          |            | -                      |
|                 | FOOD 21(h)/<br>ST536/A | ■                  | ■          | ■           |            | ■           | ■          |            |            | -                      |
|                 | FOOD 35(t)/U/B1        | ■                  |            |             |            | ■           | ■          | ■          | ■          | AMP/TE/CIP/ SXT/PRL/AK |
|                 | DP01/U/C               | ■                  |            |             |            | ■           |            |            |            | -                      |
| II              | PT1N1/U/A              | ■                  |            |             |            |             |            |            |            | AMP/TE/PRL             |
|                 | KA01/U/A               | ■                  |            |             |            | ■           |            |            |            | -                      |
|                 | UTI 7/U/B1             | ■                  | ■          | ■           | ■          |             |            | ■          |            | AMP/TE/CIP/SXT         |
|                 | CJ01/ST2534/B1         | ■                  |            |             |            |             |            |            |            | -                      |
|                 | FOOD 28(h)/U/B1        | ■                  | ■          |             |            | ■           | ■          | ■          | ■          | AMP/TE/CIP             |
| III             | UTI 9/ST354/B2         |                    | ■          | ■           | ■          |             |            | ■          |            | AMP/TE/SXT             |
|                 | FD3K2/ST624/B2         | ■                  | ■          | ■           |            |             | ■          | ■          |            | TE/CIP/SXT/C/ESBL+     |
|                 | UTI 28/U/F             | ■                  | ■          | ■           | ■          | ■           |            |            |            | AMP                    |
|                 | UTI 31/ST404/B2        | ■                  | ■          | ■           | ■          | ■           | ■          |            |            | AMP/SXT                |
| IV              | FD202/<br>ST5451/D     | ■                  | ■          | ■           |            | ■           | ■          | ■          |            | TE/SXT/ESBL+           |
|                 | CM02/U/D               | ■                  | ■          | ■           |            | ■           | ■          | ■          |            | AMP/TE/SXT/PRL         |

|   |                              |               |                   |
|---|------------------------------|---------------|-------------------|
| V | UTI 16/ST69/ <b>D</b>        | ■ ■ ■         | AMP, SXT          |
|   | WW01/ST1049/ <b>B1</b>       | ■ ■           | AMP               |
|   | FOOD 10(h)/ST6073/ <b>B1</b> | ■ ■           | AMP/TE            |
|   | FOOD 38(h)/U/U               | ■ ■ ■ ■ ■     | -                 |
|   | FOOD 29(h)/U/U               | ■ ■ ■ ■ ■     | -                 |
|   | UTI 42/U/C                   | ■ ■ ■ ■ ■ ■ ■ | AMP/TE/CIP/NF/SXT |
|   | FOOD 23(t)/U/U               | ■ ■ ■ ■ ■ ■   | -                 |
|   | FOOD 19s(b)/ST5295/ <b>A</b> | ■ ■ ■ ■ ■ ■ ■ | AMP/TE/CIP/SXT    |
|   | FOOD 25(p)/ST10888/ <b>A</b> | ■ ■ ■ ■ ■     | -                 |

Note: ■ – presence of gene; ST – sequence type (MLST); Ph – Phylogroup;

U – unknown; AMP-ampicillin, TE-tetracycline, SXT-trimethoprim/sulfamethoxazole, CIP-ciprofloxacin, PRL-piperacillin, C-chloramphenicol, AMC-amoxicillin/clavulanic acid, CXM-cefuroxime, NF-nitrofurantoin, CTX-cefotaxime, AK-amikacin;

Type of meat: h-chicken, p-pork, t-turkey, b-beef;

Table S15. Statistical association between VGs of *E. coli* isolates derived from poultry farms (n=44) – Phi coefficient

| <i>fimH</i> | <i>papC</i> | <i>iha</i> | <i>irp2</i> | <i>iss</i> | <i>usp</i> | <i>vat</i> | <i>pic</i> |
|-------------|-------------|------------|-------------|------------|------------|------------|------------|
| <i>fimH</i> | 0.01        | 0.03       | 0.12        | 0.13       | 0.26       | 0.07       | 0.25       |
|             | <i>papC</i> | 0.14       | 0.29        | 0.33*      | 0.22       | 0.14       | 0.36*      |
|             |             | <i>iha</i> | 0.09        | 0.09       | 0.13       | 0.04       | 0.13       |
|             |             |            | <i>irp2</i> | 0.59*      | 0.37*      | 0.18       | 0.66*      |
|             |             |            |             | <i>iss</i> | 0.53*      | 0.19       | 0.60*      |
|             |             |            |             |            | <i>usp</i> | 0.26       | 0.67*      |
|             |             |            |             |            |            | <i>vat</i> | 0.27       |
|             |             |            |             |            |            |            | <i>pic</i> |

Phi coefficient values:



Very strong associations between variables  $\phi > 0.7$ ; strong associations  $0.5 < \phi < 0.7$ ; moderate associations  $0.3 < \phi < 0.5$ ; weak associations  $\phi < 0.3$

Table S16. Statistical association between VGs of *E. coli* isolates derived from UTI (n=50) - Phi coefficient

| <i>fimH</i> | <i>papC</i> | <i>iha</i> | <i>irp2</i> | <i>iss</i> | <i>usp</i> | <i>vat</i> | <i>pic</i> |
|-------------|-------------|------------|-------------|------------|------------|------------|------------|
| <i>fimH</i> | 0.24        | 0.09       | 0.03        | 0.21*      | 0.02       | 0.08       | 0.13       |
|             | <i>papC</i> | 0.09       | 0.34*       | 0.28*      | 0.24       | 0.27       | 0.27       |
|             |             | <i>iha</i> | 0.13        | 0.02       | 0.09       | 0.09       | 0.18       |
|             |             |            | <i>irp2</i> | 0.08       | 0.70*      | 0.11       | 0.02       |
|             |             |            |             | <i>iss</i> | 0.21       | 0.01       | 0.03       |
|             |             |            |             |            | <i>usp</i> | 0.24       | 0.13       |
|             |             |            |             |            |            | <i>vat</i> | 0.46*      |
|             |             |            |             |            |            |            | <i>pic</i> |

Phi coefficient values:

Very strong associations between variables  $\phi > 0.7$ ; strong associations  $0.5 < \phi < 0.7$ ; moderate associations  $0.3 < \phi < 0.5$ ; weak associations  $\phi < 0.3$

Table S17. Statistical association between VGs of *E. coli* isolates derived from food (n=38) - Phi coefficient

| <i>fimH</i> | <i>papC</i> | <i>iha</i> | <i>irp2</i> | <i>iss</i> | <i>usp</i> | <i>vat</i> | <i>pic</i> |
|-------------|-------------|------------|-------------|------------|------------|------------|------------|
| <i>fimH</i> | 0.18        | 0.16       | 0.23        | 0.35*      | 0.10       | 0.12       | 0.38*      |
|             | <i>papC</i> | 0.28       | 0.22        | 0.41*      | 0.24       | 0.18       | 0.59*      |
|             |             | <i>iha</i> | 0.14        | 0.30       | 0.17       | 0.16       | 0.28       |
|             |             |            | <i>irp2</i> | 0.04       | 0.14       | 0.29       | 0.34*      |
|             |             |            |             | <i>iss</i> | 0.40*      | 0.03       | 0.41*      |
|             |             |            |             |            | <i>usp</i> | 0.10       | 0.24       |
|             |             |            |             |            |            | <i>vat</i> | 0.20       |

*pic*

Phi coefficient values:

Very strong associations between variables  $\phi > 0.7$ ; strong associations  $0.5 < \phi < 0.7$

moderate associations  $0.3 < \phi < 0.5$ ; weak associations  $\phi < 0.3$



Figure S1. Dendrogram generated from ERIC-PCR banding pattern of 132 *E. coli* isolated from poultry farms, food and patients with UTI symptoms. The process was performed in a volume of 25  $\mu$ L, including 2.5  $\mu$ L of 10x Taq buffer, 2.5  $\mu$ L of each dNTP Mix, 0.6  $\mu$ L of forward and reverse primers, 1  $\mu$ g of template DNA, 0.62 U of DreamTag DNA polymerase, and nuclease-free water. The reaction products were isolated with 1% agarose gel electrophoresis (Amresco) and visualized with GelDoc XR (Biorad). The similarity analysis was performed with Dice coefficient and UPGMA method.
